# Supplementary material for: Identification of Creb3l4 as an essential negative regulator of adipogenesis
Source: PubMed Central journal article supplement (PMC4260748; doi:10.1038/cddis.2014.490), 2014-11-20
Supplement: cddis2014490x1.pdf [file cddis2014490x1.pdf]

## Supplementary Information

### Identification of *Creb3l4* as an essential negative regulator of adipogenesis

Tae-Hyun Kim<sup>1</sup>, Seong-Ho Jo<sup>1,2</sup>, Hyeonjin Choi<sup>1</sup>, Joo-Man Park<sup>1</sup>, Mi-Young Kim<sup>1</sup>, Hiroshi Nojima<sup>3</sup>,  
Jae-Woo Kim<sup>1,2</sup>, Yong-Ho Ahn<sup>1,2,\*</sup>

<sup>1</sup>Department of Biochemistry and Molecular Biology, Yonsei University College of Medicine, Seoul 120-752, Republic of Korea

<sup>2</sup>Brain Korea 21 PLUS Project for Medical Sciences, Yonsei University College of Medicine, Seoul 120-752, Republic of Korea

<sup>3</sup>Department of Molecular Genetics Research Institute for Microbial Diseases Osaka University, Osaka, Japan

**\*Corresponding author:** Yong-Ho Ahn, MD, PhD;

Dept. of Biochemistry and Molecular Biology,

Yonsei University College of Medicine,

50-1 Yonsei-ro, Seodaemun-gu, Seoul 120-752, Republic of Korea.

Tel: +82-2-2228-0835, Fax: +82-2-312-5041,

e-mail: [yha111@yuhs.ac](mailto:yha111@yuhs.ac)

## Supplementary Figure S1

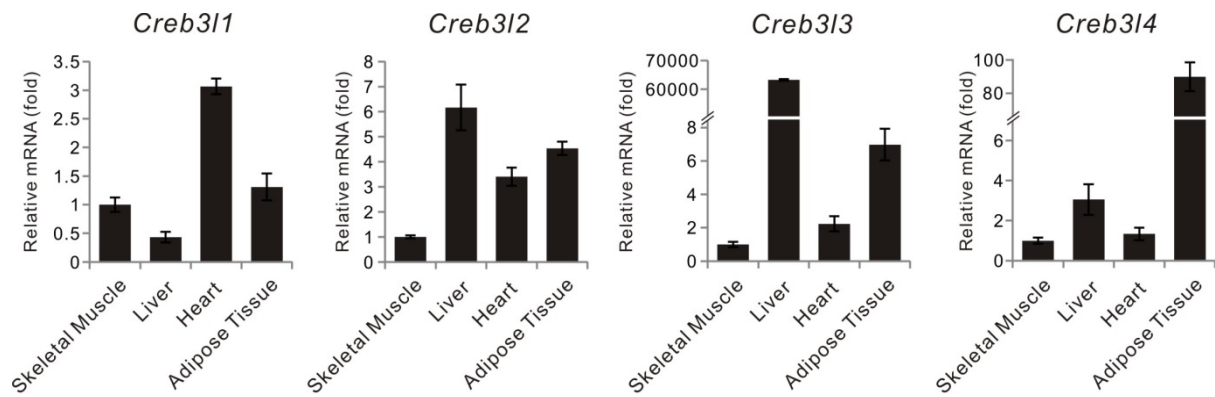

**Supplementary Figure S1.** Expression of CREB3L-family members in mice. The mRNA levels of *Creb3l* family members in the liver, heart, muscle, and white adipose tissue (WAT) was measured by real-time PCR; expression levels were normalized to that of the *Rplp0* (*36B4*) control. Error bars represent mean  $\pm$  SD.

Supplementary Figure S2

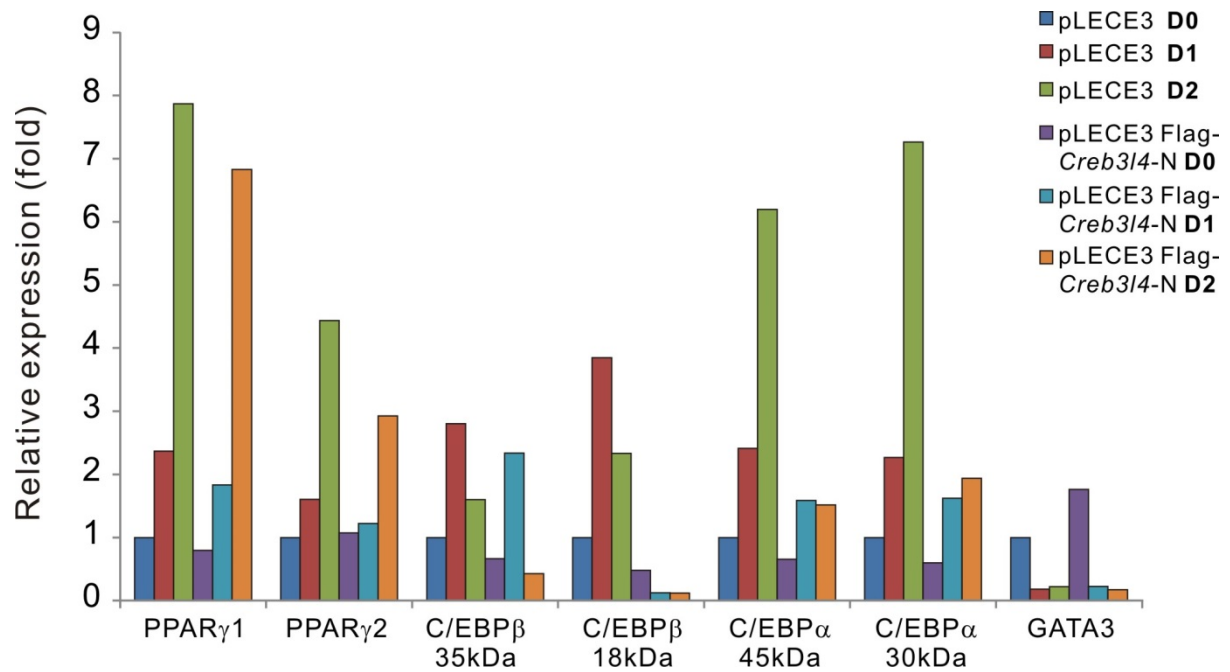

**Supplementary Figure S2.** Quantification analysis of western blot data from Figure 2b. Signal intensities were quantitated using Image J after normalization to GAPDH levels.

### Supplementary Figure S3

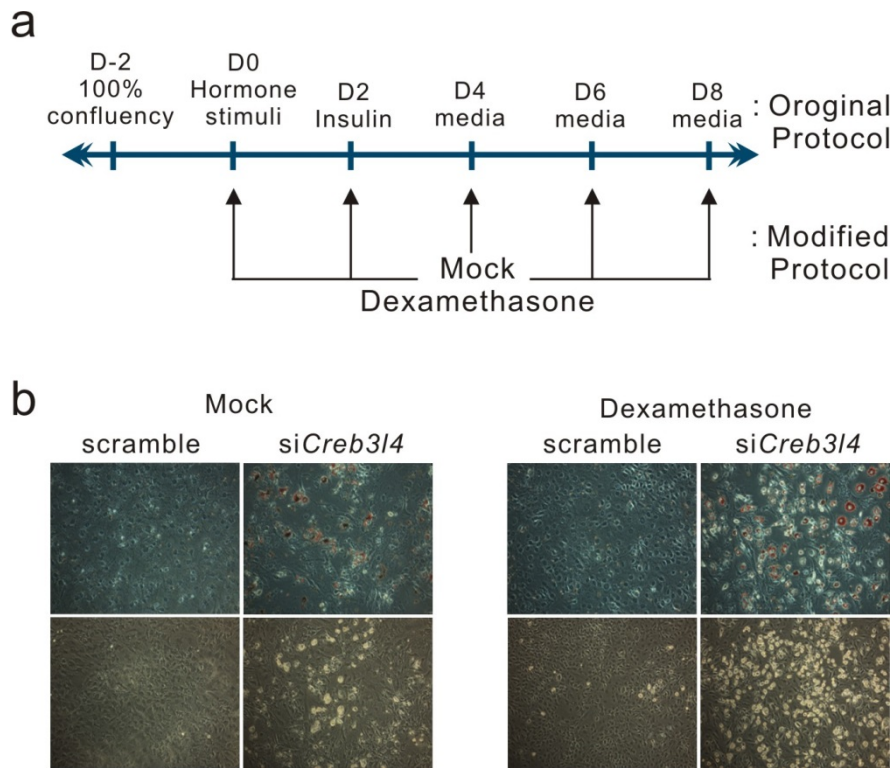

**Supplementary Figure S3.** Effect of *Creb314* ablation on adipocyte differentiation (a) A modified protocol for inducing adipocyte differentiation. Induction of adipogenesis in 3T3-L1 cells expressing si*Creb314*. (b) Cells were treated with either mock or dexamethasone (1  $\mu$ M) in 10% FBS–DMEM. The medium was changed every 2 days. After 8 days, the cells were stained with oil-red O. Microscopic views representative of three independent experiments are shown.

## Supplementary Figure S4

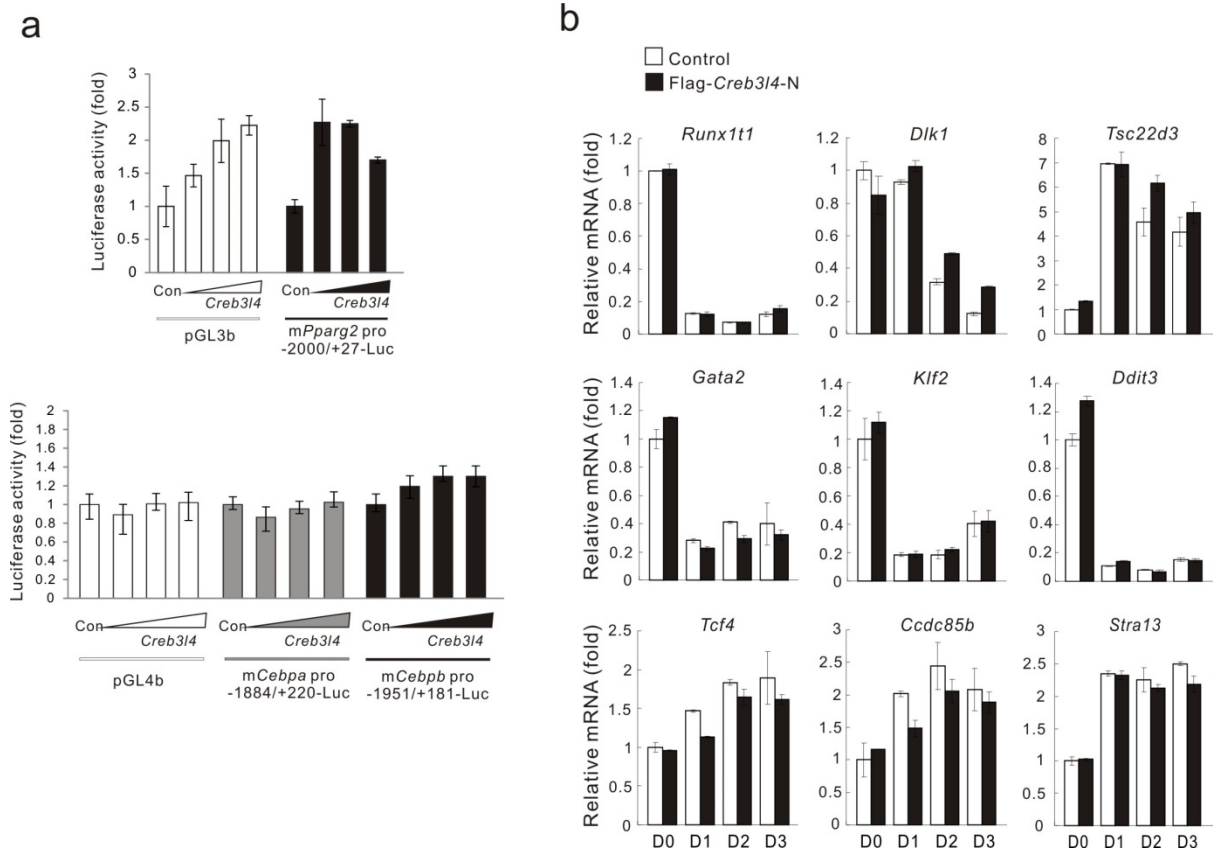

**Supplementary Figure S4.** Effect of CREB3L4 on the promoter activities of adipogenic factors and gene expression of negative transcriptional regulators. (a) Effect of CREB3L4 on the promoter activities of *Pparg2*, *Cebpa*, and *Cebpb*. NIH-3T3 cells were cotransfected with pcFlag-*Creb314* (0, 50, 100, or 200 ng), luciferase reporters (500 ng; mouse *Pparg2* promoter covering -2000/+27, mouse *Cebpa* promoter covering -1884/+220, mouse *Cebpb* promoter covering -1951/+181), and *Renilla* luciferase plasmid. The total amount of transfected plasmid was adjusted to 200 ng by adding empty vector. Luciferase activities were normalized to *Renilla* luciferase activities to adjust for transfection efficiency. Normalized activities are shown as the mean  $\pm$  SD of three independent experiments performed in triplicate, and are expressed as fold-increase relative to the basal activity. (b) The mRNA levels of negative regulators of adipogenesis, as determined by real-time PCR. 3T3-L1 preadipocytes cells were transfected with Flag-*Creb314* (N) by electroporation, and differentiation was induced with medium containing DMI (0.5 mM 3-isobutyl-1-methylxanthine [IBMX; M], 1  $\mu$ M dexamethasone [D], and 1  $\mu$ g/ml of insulin [I]). The cells were harvested at the indicated times. Error bars represent mean  $\pm$  SD.

## Supplementary Figure S5

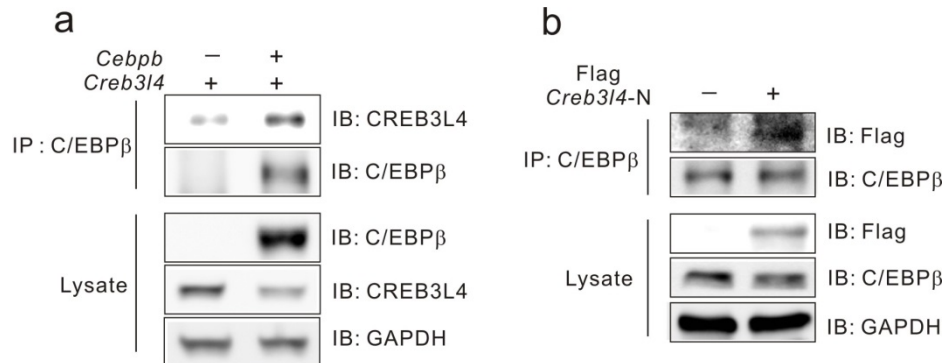

**Supplementary Figure S5.** Interaction between C/EBPβ and CREB3L4. (a) NIH-3T3 cells were co-transfected with *Creb3l4* and *Cebpβ* expression vectors and then immunoprecipitated using an anti-C/EBPβ antibody. (b) Interaction of endogenous C/EBPβ and CREB3L4 in 3T3-L1 cells. Cells were transfected with Flag-tagged *Creb3l4-N* expression vector and precipitated with anti-C/EBPβ antibody.

## Supplementary Figure S6

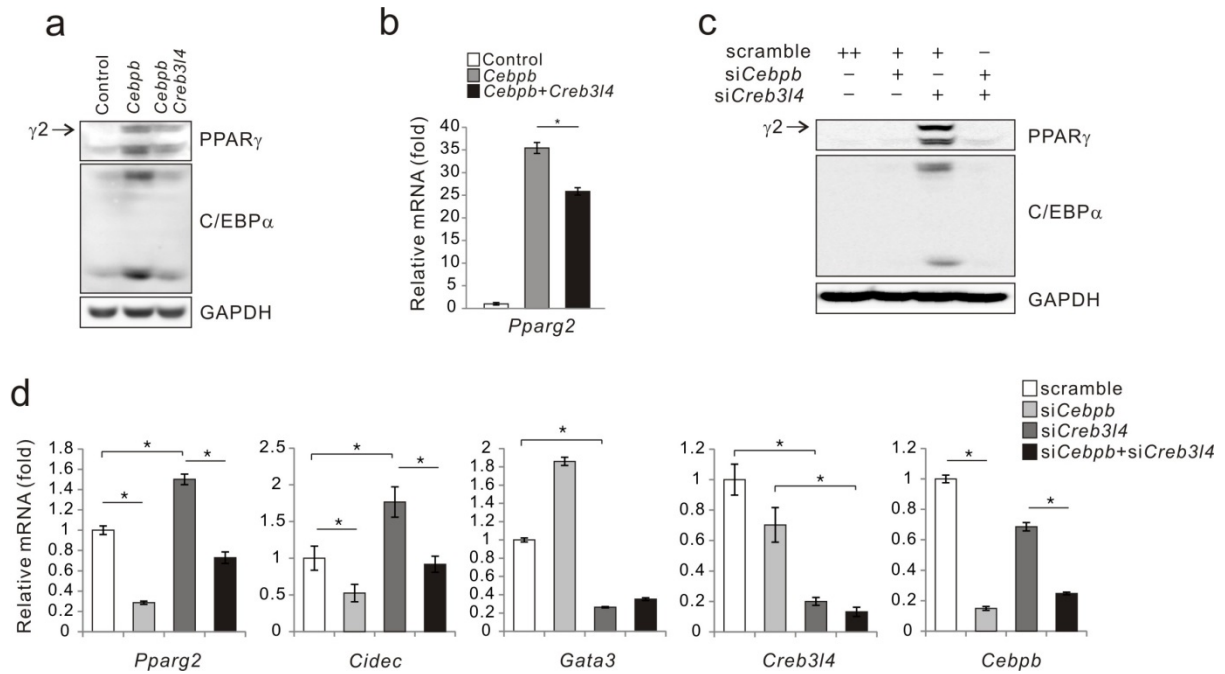

**Supplementary Figure S6.** Effect of C/EBP $\beta$  on siCreb3l4-induced PPAR $\gamma 2$  expression. (a) 3T3-L1 cells were transfected with *Cebpb* or *Cebpb/Creb3l4* and stimulated to differentiate with 10% FBS–DMEM containing insulin (1  $\mu\text{g}/\text{ml}$ ) every 2 days. Immunoblot of transcription factors involved in adipogenesis in 3T3-L1 cells at day 8. (b) 3T3-L1 cells were transfected with constructs containing *Cebpb* or *Cebpb/Creb3l4*. Expression of *Pparg2* in 3T3-L1 cells expressing *Cebpb* or *Cebpb/Creb3l4* at day 0, as analyzed by real-time PCR. (c) Immunoblot of C/EBP $\alpha$  and PPAR $\gamma 2$  at day 8. siCebpb and siCreb3l4 were transfected into 3T3-L1 cells. The cells were stimulated to differentiate with 10% FBS–DMEM containing insulin (1  $\mu\text{g}/\text{ml}$ ) every 2 days. (d) The mRNA levels of *Pparg2*, *Cidec*, *Gata3*, *Creb3l4*, and *Cebpb* in 3T3-L1 cells transfected with siCebpb and siCreb3l4 at day 0. Values are expressed as mean  $\pm$  SEM,  $n = 3$  per group, \* $P < 0.05$ .

## Supplementary Figure S7

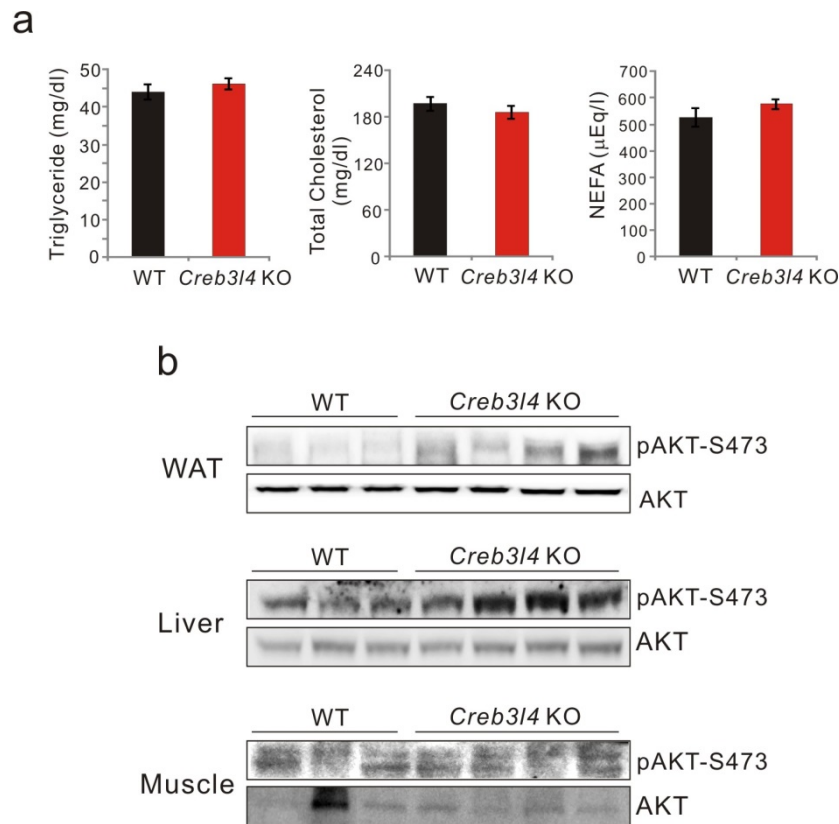

**Supplementary Figure S7.** The phenotype of *Creb3/4* KO mice (a) Serum lipid profiles, triglyceride, total cholesterol, and non-esterified fatty acid (NEFA) levels were measured by enzymatic methods using an autoanalyzer (n = 7–15). Values are expressed as mean  $\pm$  SEM. (b) Mice fed HFD were fasted for 6hr and then received insulin (5U/kg) by intraperitoneal injection. After 5 min, the mice were sacrificed. One gram of each tissue was homogenized in RIPA buffer and subjected to western blot using anti-pAKT-S473, anti-AKT-total antibodies.



**Table S1.** List of primer sequence for gene-specific real-time PCR.

| Gene           | Forward (5' → 3')        | Reverse (5' → 3')           |
|----------------|--------------------------|-----------------------------|
| <i>Creb3l1</i> | TCTTTGATGACCCTGTGCTGGA   | TCCTCCATCTTGACAGGCACAA      |
| <i>Creb3l2</i> | CAAGCTGAGCGAGCTGTCAGAG   | CCACCTCCATTGACTCGCTCTT      |
| <i>Creb3l3</i> | GACAGCATGGAGGTCCTTGA     | TCCCAGGATGCAATTTAGGA        |
| <i>Creb3l4</i> | ATATCTTCTCGACGGGATCCTT   | TCCCTACCAGGAGATGTTTC        |
| <i>Pparg2</i>  | CCAGAGCATGGTGCCTTCGCT    | CAGCAACCATTGGGTCAGCTC       |
| <i>Cebpa</i> □ | GAACAGCAACGAGTACCGGGTA   | GCCATGGCCTTGACCAAGGAG       |
| <i>Cebpb</i>   | CAAGCTGAGCGACGAGTACA     | CAGCTGCTCCACCTTCTTCT        |
| <i>Gata3</i>   | AACAGACCCCTGACTATGAAGAA  | GGTTGAAGGAGCTGCTCTTGGG      |
| <i>Gata2</i>   | GGCACCTGTTGTGCAAATTGTCA  | CCTTCTTCATGGTCAGTGGC        |
| <i>Runx1t1</i> | GGCCAGCGGTACAGTCCAAATA   | GATAGGAGTCCCTGTAGTGGTG      |
| <i>Dlk1</i>    | GACCCACCCTGTGACCCC       | CAGGCAGCTCGTGCACCCC         |
| <i>Tsc22d3</i> | GCTGCACAATTTCTCCACCT     | GAGGTCCATGGCCTGCTCAAT       |
| <i>Klf2</i>    | GGCCCCAGCTTCGGCGGC       | TGAGGAGACCGCGCGTGGCA        |
| <i>Ddit3</i>   | TGAGTCCCTGCCTTTCACCTTG   | GGTCCTCTGTCAGCCAAGCTA       |
| <i>Tcf4</i>    | AGAGATGAGAGCGAAGGTGGT    | CTGTTCGTTCCCTCCGGGCC        |
| <i>Ccdc85b</i> | CTGATGCAGGAGGTGAATCG     | CGAGTCCAGAAAGCAGCAGA        |
| <i>Stra13</i>  | GGAAGGAACTGGTGAGCAGAC    | GCAGCCTCTAGTACGAAGATCC      |
| <i>Cidec</i>   | TCCAGGACATCTTGAAACTT     | GGCTTGCAAGTATTCTTCTGT       |
| <i>Lxra</i>    | GAGAAGCTGGTGGCTGCCCA     | AGCTGTAGGAAGCCAGGGAG        |
| <i>Adipoq</i>  | ATGGCAGAGATGGCACTCCT     | CCTTCAGCTCCTGTCATTCC        |
| <i>Pepck</i>   | ACACACACACATGCTCACAC     | ATCACCGCATAGTCTCTGAA        |
| <i>Rplp0</i>   | TGGCCAATAAGGTGCCAGCTGCTG | CTTGTCTCCAGTCTTTATCAGCTGCAC |
